# Supplementary material
Source: PubMed Central journal article supplement (PMC2904301)
Supplement: NIHMS198540-supplement-1.pdf [file NIHMS198540-supplement-1.pdf]

## ICU Patient Centered Rounds<sup>1</sup>

HD# / POD# \_\_\_\_\_ / \_\_\_\_\_

Surgeon \_\_\_\_\_

Today's Date \_\_\_\_\_

Patient Label

| <b>Neuro</b>                  |                                                    |   |    | Comments/Plan/Rounding Updates |
|-------------------------------|----------------------------------------------------|---|----|--------------------------------|
| Y                             | Sedation Holiday?                                  | N | NA |                                |
| Y                             | Analgesia-sedation adequate?                       | N | NA |                                |
| Y                             | Reduce sedation?                                   | N | NA |                                |
| Y                             | Moves All Extremities?                             | N | NA |                                |
| Y                             | Follows Commands?                                  | N | NA |                                |
| Y                             | Able to Communicate Effectively? Preferred Method? | N | NA |                                |
| Y                             | Speech/Interpreter Referral                        | N | NA |                                |
| Y                             |                                                    | N | NA |                                |
| <b>Cardiac</b>                |                                                    |   |    | Comments/Plan/Rounding Updates |
| Y                             | Vitals/Hemodynamics Stable?                        | N | NA |                                |
| Y                             | EKG Changed?                                       | N | NA |                                |
| Y                             | Pacer Check?                                       | N | NA | *underlying rhythm?            |
| Y                             | Can Chest Tubes Be Removed?                        | N | NA |                                |
| Y                             | Change In Parameters?                              | N | NA |                                |
| Y                             | Can Drips Be Titrated?                             | N | NA |                                |
| Y                             |                                                    | N | NA |                                |
| <b>Respiratory/Ventilator</b> |                                                    |   |    | Comments/Plan/Rounding Updates |
| Y                             | Ventilator/ABG Goals Met?                          | N | NA |                                |
| Y                             | Weaning Trial?                                     | N | NA |                                |
| Y                             | Change In Parameters?                              | N | NA |                                |
| Y                             | HOB > 30 Degrees?                                  | N | NA |                                |
| Y                             | Oral Care?                                         | N | NA |                                |
| Y                             |                                                    | N | NA |                                |
| <b>Vascular</b>               |                                                    |   |    | Comments/Plan/Rounding Updates |
| Y                             | Pulses present?                                    | N | NA |                                |
| Y                             | Warm & Well-Perfused?                              | N | NA |                                |
| Y                             | SCD's? TED's?                                      | N | NA |                                |
| Y                             | DVT Prophylaxis?                                   | N | NA |                                |
| Y                             |                                                    | N | NA |                                |
| <b>GI</b>                     |                                                    |   |    | Comments/Plan/Rounding Updates |
| Y                             | Diet ordered? Advance Diet?                        | N | NA | *last BM?                      |
| Y                             | Dobhoff/OG/NG Tube In Place?                       | N | NA |                                |
| Y                             | OG/NG Tube Functioning?                            | N | NA |                                |
| Y                             | Tube Feeding At Goal?                              | N | NA |                                |
| Y                             | GI Prophylaxis?                                    | N | NA |                                |
| Y                             | Abdominal Drains Intact?                           | N | NA |                                |
| Y                             |                                                    | N | NA |                                |

1. Patient Centered Rounds [adapted from Patient Centered Rounds, University of Michigan, Cardiovascular Intensive Care Unit]. University of Michigan Health Systems. 2008.

| <b>ICU Patient Centered Rounds (con't)</b> |                              |   |    |                                               |
|--------------------------------------------|------------------------------|---|----|-----------------------------------------------|
| <b>GU</b>                                  |                              |   |    | Comments/Plan/Rounding Updates                |
| Y                                          | Urine Output Adequate?       | N | NA | *fluid restrictions?                          |
| Y                                          | Fluid Balance Goals Met?     | N | NA |                                               |
| Y                                          | Foley DC?                    | N | NA |                                               |
| Y                                          | Dialysis Goals Met?          | N | NA |                                               |
| Y                                          | Appropriate IV Fluids?       | N | NA |                                               |
| Y                                          |                              | N | NA |                                               |
| <b>ID</b>                                  |                              |   |    | Comments/Plan/Rounding Updates                |
| Y                                          | Dressing Changes Per Policy? | N | NA |                                               |
| Y                                          | All Lines Necessary?         | N | NA |                                               |
| Y                                          | Any Lines Need Changed?      | N | NA |                                               |
| Y                                          |                              | N | NA |                                               |
| <b>Heme/Endo</b>                           |                              |   |    | Comments/Plan/Rounding Updates                |
| Y                                          | Need Blood Products?         | N | NA | *platelets <80 ask if ASA, others to be held? |
| Y                                          | Platelet Count? ASA?         | N | NA |                                               |
| Y                                          | PT/PTT/INR Goal Met?         | N | NA |                                               |
| Y                                          | Blood Glucose At Goal?       | N | NA |                                               |
| Y                                          |                              | N | NA |                                               |
| <b>Skin/Wounds</b>                         |                              |   |    | Comments/Plan/Rounding Updates                |
| Y                                          | Incision Wound Appropriate?  | N | NA |                                               |
| Y                                          | Dressing/Treatment?          | N | NA |                                               |
| Y                                          | Pressure Ulcers?             | N | NA |                                               |
| Y                                          | Wound Healing Appropriate?   | N | NA |                                               |
| Y                                          | Referral?                    | N | NA |                                               |
| Y                                          |                              | N | NA |                                               |
| <b>Mobility/Safety</b>                     |                              |   |    | Comments/Plan/Rounding Updates                |
| Y                                          | Chair? OOB? Ambulating?      | N | NA |                                               |
| Y                                          | PT Initiated? Goals Met?     | N | NA |                                               |
| Y                                          | Fall Risk?                   | N | NA |                                               |
| Y                                          | Restraints? Current Order?   | N | NA |                                               |
| Y                                          |                              | N | NA |                                               |
| <b>Social/Disposition</b>                  |                              |   |    | Comments/Plan/Rounding Updates                |
| Y                                          | Code Status Addressed?       | N | NA |                                               |
| Y                                          | Transfer To Floor?           | N | NA |                                               |
| Y                                          | Discharge Teaching Provided? | N | NA |                                               |
| Y                                          | Patient/Family Updated?      | N | NA |                                               |
| Y                                          |                              | N | NA |                                               |
| <b>Medications/Miscellaneous</b>           |                              |   |    | Comments/Plan/Rounding Updates                |
| Y                                          | All Medications Necessary?   | N | NA |                                               |
| Y                                          | Antibiotics Dates Correct?   | N | NA |                                               |
| Y                                          | MAR Reconciled?              | N | NA |                                               |
| Y                                          | Current Type And Screen?     | N | NA |                                               |
| Y                                          | Are Labs Appropriate?        | N | NA |                                               |
