# Supplementary material
Source: PubMed Central journal article supplement (PMC2904301)
Supplement: NIHMS198540-supplement-6.pdf [file NIHMS198540-supplement-6.pdf]

# PAIN CHART

**THIS BOARD BELONGS TO:**

(Place Label Here)

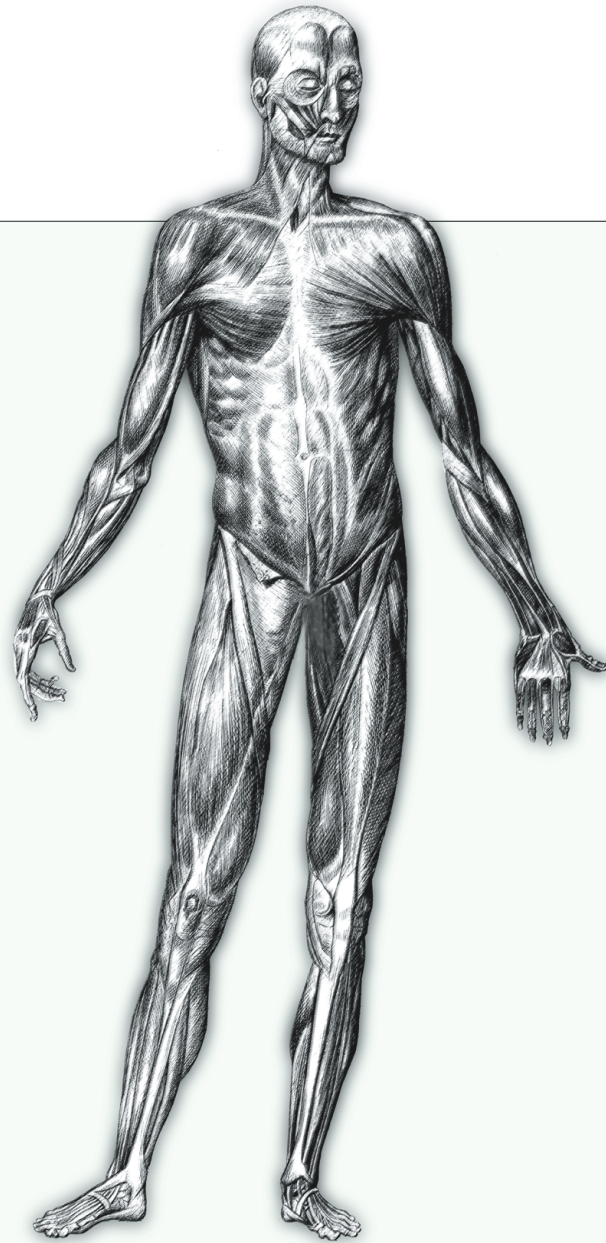

● **LEVEL OF PAIN**

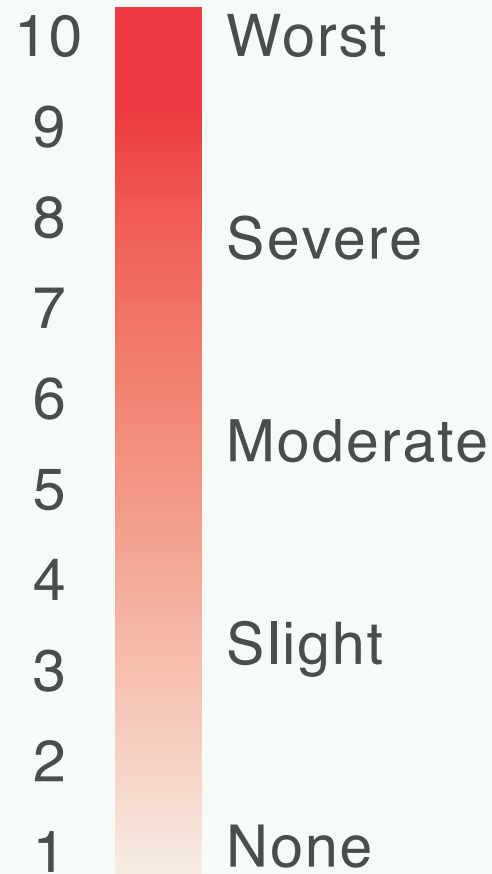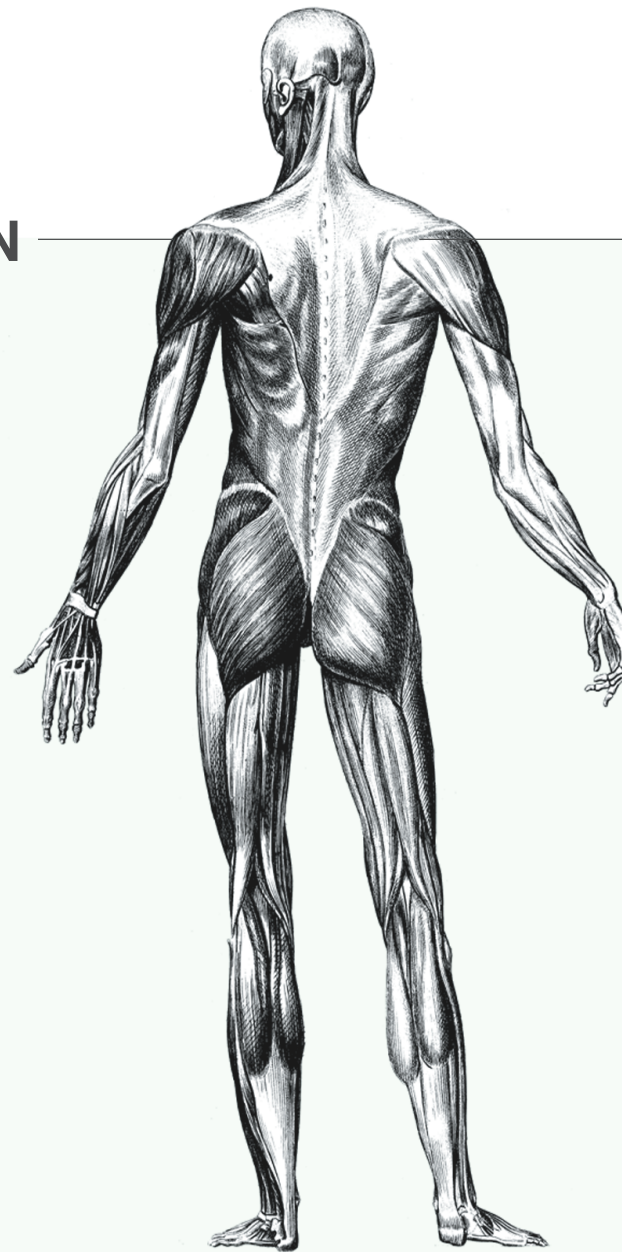

● **THIS PART**  
(Of My Body)

- Itches
- Stings
- Hurts
- Cramps
- Can't Move
- Is Numb
- Aches
- Burns
- Is Tender

● **THE PAIN IS**

- Constant
- Intermittent
- Radiating
- Throbbing
- Dull/Aching
- Sharp

**I WANT**  
Pain Medicine

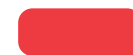

**MEMO:** \_\_\_\_\_

\_\_\_\_\_  
\_\_\_\_\_

- **PLAN OF CARE:**  YES  NO  Please Explain  I Need Reassurance
- Where  When  What  Stop  What Is The Plan?  When Can
- How  Why  Who  Continue  How Am I Doing?  I Go Home?
