# Supplementary material
Source: PubMed Central journal article supplement (PMC2904301)

# PAIN CHART

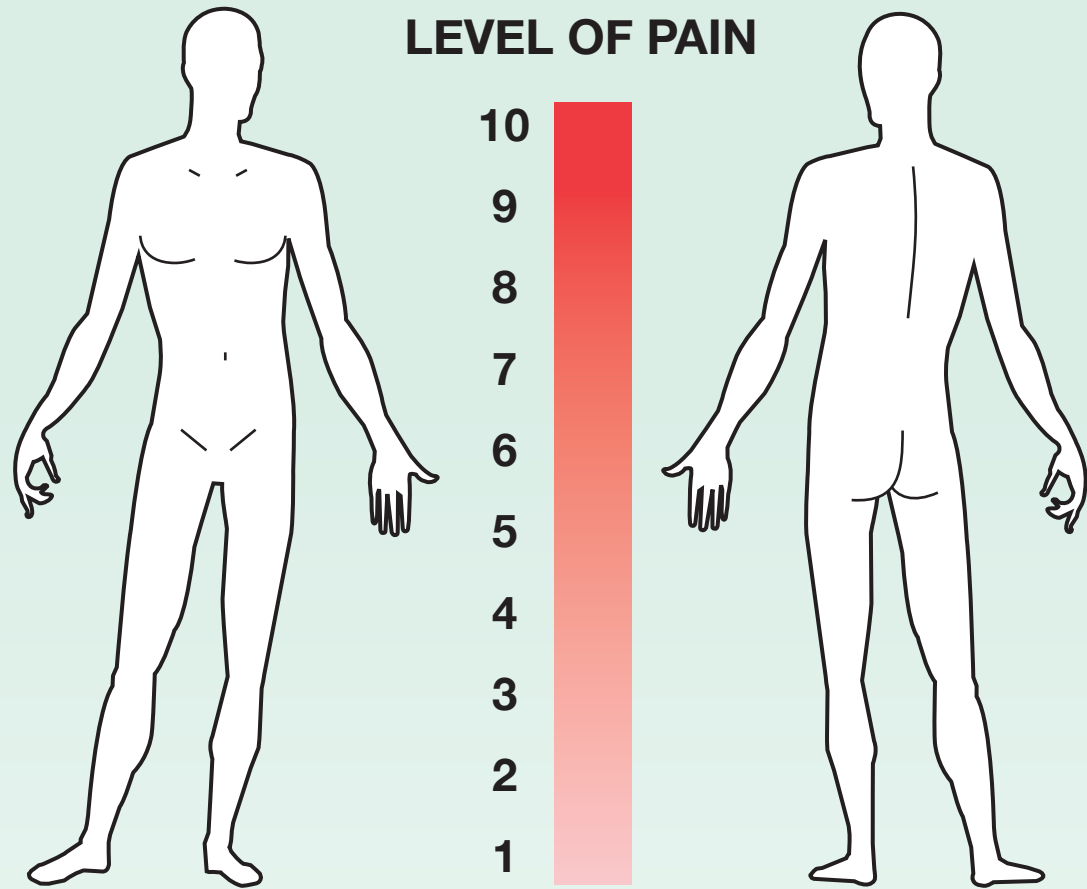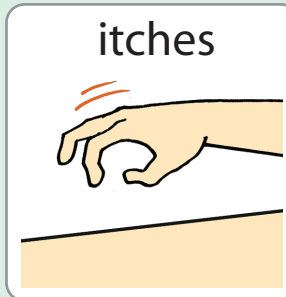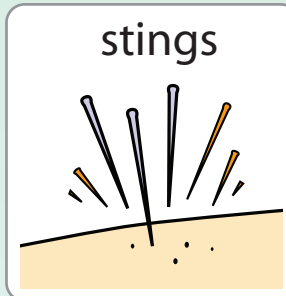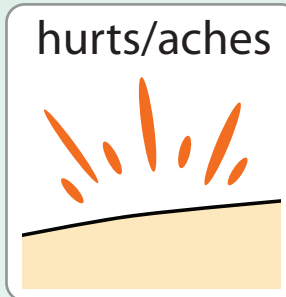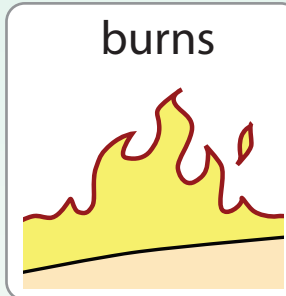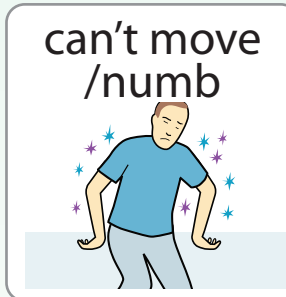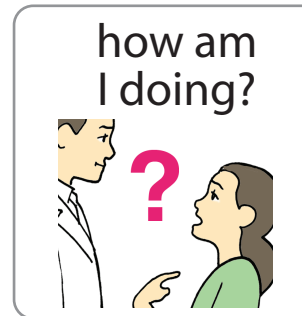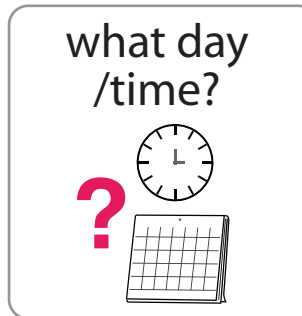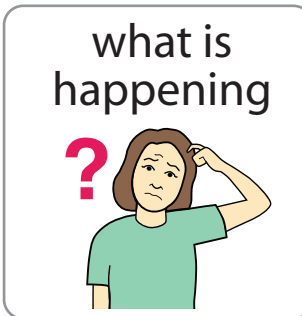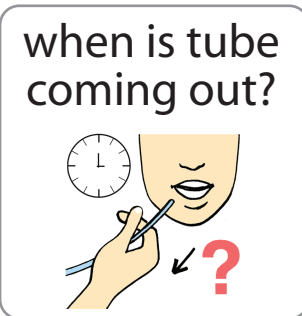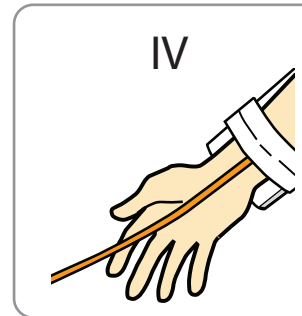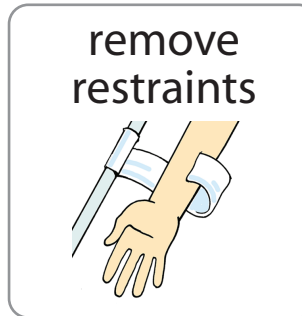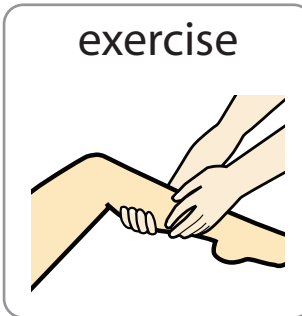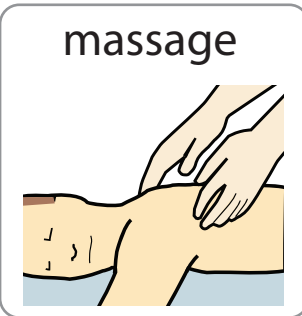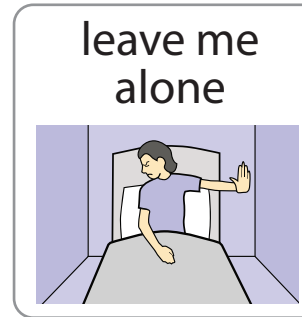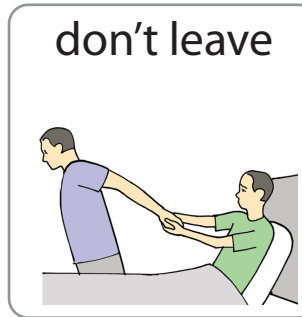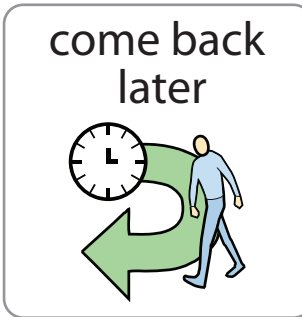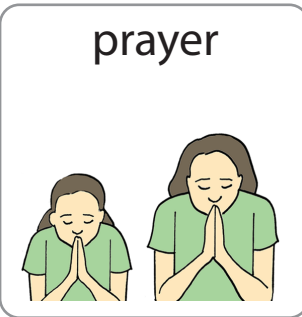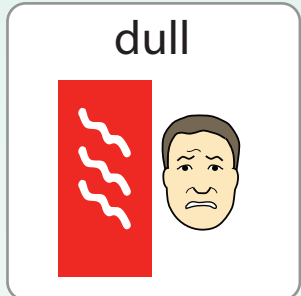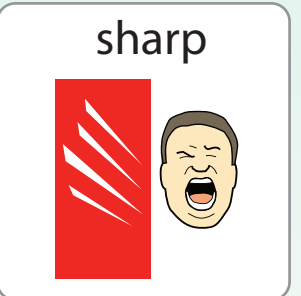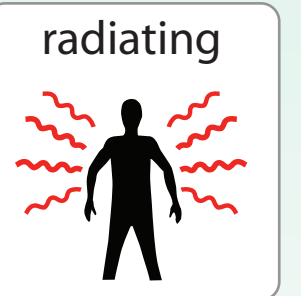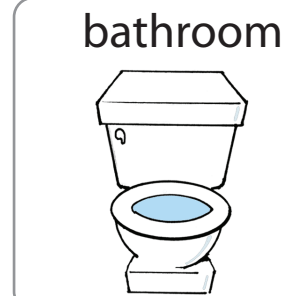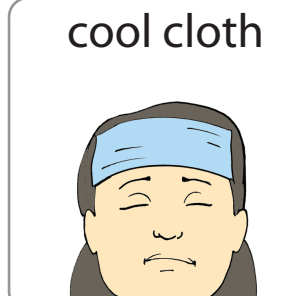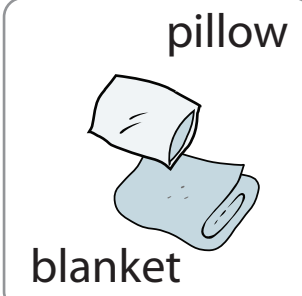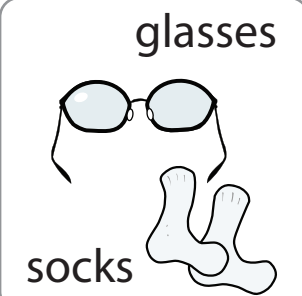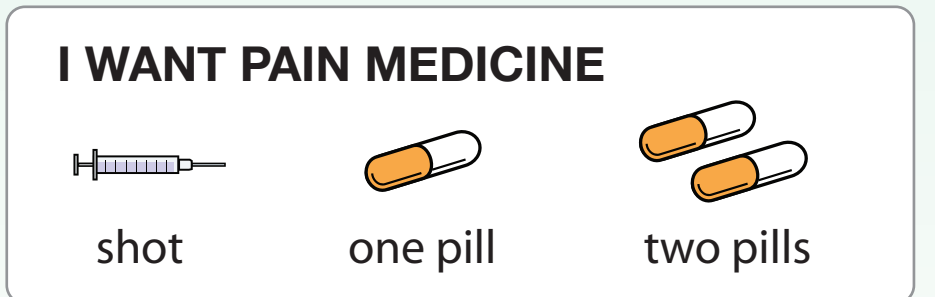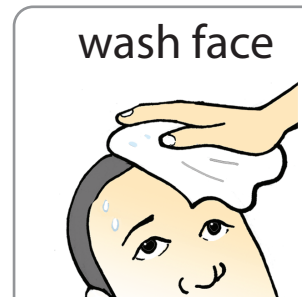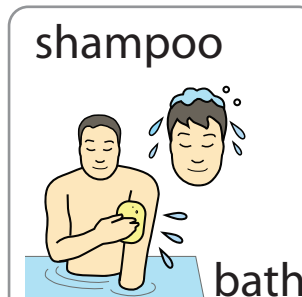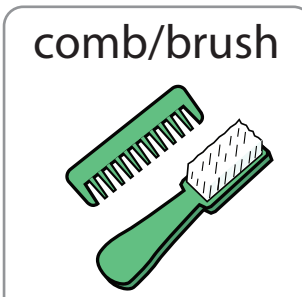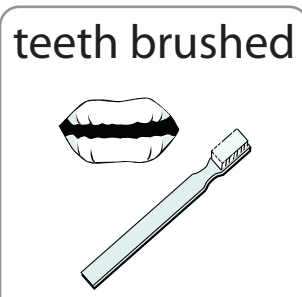

Supplement: NIHMS198540-supplement-4.pdf [file NIHMS198540-supplement-4.pdf]
